# Supplementary material
Source: PubMed Central journal article supplement (PMC1794705)
Supplement: 7400824-s1.pdf [file 7400824-s1.pdf]

## SUPPORTING ONLINE MATERIAL

### SUPPLEMENTARY FIGURES

**Fig S1 | (A-C)** Pharmacological inactivation of Crm1 by LMB affects the centromeric localization of **(A)** Survivin-GFP, Aurora-B, **(C)** INCENP and, **(D)** Borealin-GFP. **(B)** LMB treatment also affects the localization of Survivin-GFP to the midbody. Cells were treated with LMB for 6 h. Aurora-B, INCENP and Survivin were detected by immunostaining (red). DNA was stained with Hoechst. Arrows mark midbody. **(E)** The Survivin NES is active *in trans*. Nuclear injected recombinant GST-SurvNES-GFP is efficiently exported, in contrast to export deficient GST-SurvNESmut-GFP. GFP-fusions were detected by fluorescence microscopy. Bars, 10  $\mu\text{m}$ . **(F)** Alignment of mammalian Survivin NESs: *Homo sapiens* (Hs), *Pan trophogloydes* (Pt), *Bos taurus* (Bt), *Sus scrofa* (Ss), *Canis familiaris* (Cf), *Felis canis* (Fc), *Mus musculus* (Mm), *Rattus norvegicus* (Rn).  $\Omega$  denotes aa M, V, or F. **(G)** Localization of siRNA-resistant Survivin<sub>mNES</sub>-GFP in cells transfected with Survivin siRNA or a control siRNA together with a RFP expression plasmid as the transfection control. **(H)** Crm1-siRNA induced ablation of Crm1. Survivin-GFP expressing cells were transfected with Crm1 or a control (ctl) siRNA. 48 h later, the expression of Crm1 and Survivin-GFP was analyzed by immunoblot. Actin served as the loading control. **(J)** Crm1 and Survivin-GFP partially colocalize at the centromere. Survivin-GFP shows a significant colocalization with Crm1 compared to Survivin<sub>mNES</sub>-GFP and metaphase chromosomes, which served as the negative control. Maximal colocalization is observed for Survivin-GFP stained with  $\alpha$ -Survivin Ab. Cells were pre-extracted with digitonin before fixation and stained using  $\alpha$ -Crm1 and  $\alpha$ -Survivin Abs. DNA was visualized using TO-PRO<sup>®</sup>-3 iodide. The correlation coefficient was quantified by 2D scatterplot analysis using the Leica colocalization software. Bars, 10  $\mu\text{m}$ .

**Fig S2 | (A-D)** Time-lapse imaging of GFP-fusion proteins during G2/M transition was followed by confocal microscopy in A431 cells. Bars, 10  $\mu\text{m}$ .

**(E)** The localization of Survivin-GFP, Survivin<sub>mNES</sub>-GFP and Borealin-GFP during mitosis was followed in the cells depicted in Fig 2F, S2A,D.

**(F)** IPs from metaphase enriched synchronised HeLa cell extracts was performed using  $\alpha$ -Survivin Ab. Cells arrested in mitosis were collected by shake-off after overnight incubation with 50 ng/ml nocodazole and released from the arrest in nocodazole-free medium for 1 h prior to lysate preparation. Precipitated proteins were detected by immunoblot using  $\alpha$ -Crm1, -Survivin, and -Aurora-B Ab.

**(G)** IPs from mitotic HeLa cell extracts was performed using  $\alpha$ -Borealin Ab. Borealin, INCENP, Aurora-B and Survivin-FLAG or Survivin<sub>mNES</sub>-FLAG were detected by immunoblot.

(H) HeLa cells stably expressing intermediate (sort1) or low (sort2) amounts of siRNA-resistant Survivin-GFP fusions (Survivin<sub>R-mNES</sub>-GFP), were transfected with Survivin siRNA or a control siRNA together with a RFP expression plasmid. The number of cells with two or more nuclei was examined in at least 100 GFP- and RFP-double-positive cells, and the percentages of multinucleated cells were determined (mean±SD, n=3).

(J) Expression levels of Survivin<sub>R-mNES</sub>-GFP and endogenous Survivin as well as depletion of endogenous Survivin were analyzed by immunoblot using  $\alpha$ -Survivin Ab. Actin served as the loading control.

**Fig S3** | Model for the role of Crm1 in targeting the CPC to the centromere. Borealin is complexed with Survivin, which can bind to Aurora-B kinase and is incorporated into the CP-holocomplex by interacting with INCENP. The NES in Survivin mediates recruitment of Crm1/RanGTP, which seems to be involved in guiding the CPC to the centromeres in early prophase by a still unknown mechanism. This process might be catalyzed by the activity of the guanine nucleotide-exchange factor RCC1 or TD60. Hydrolysis of RanGTP, by factors like RanBPs/Ran-GAP1, may facilitate the release of Crm1 and deposition of the CPC at the inner centromere.

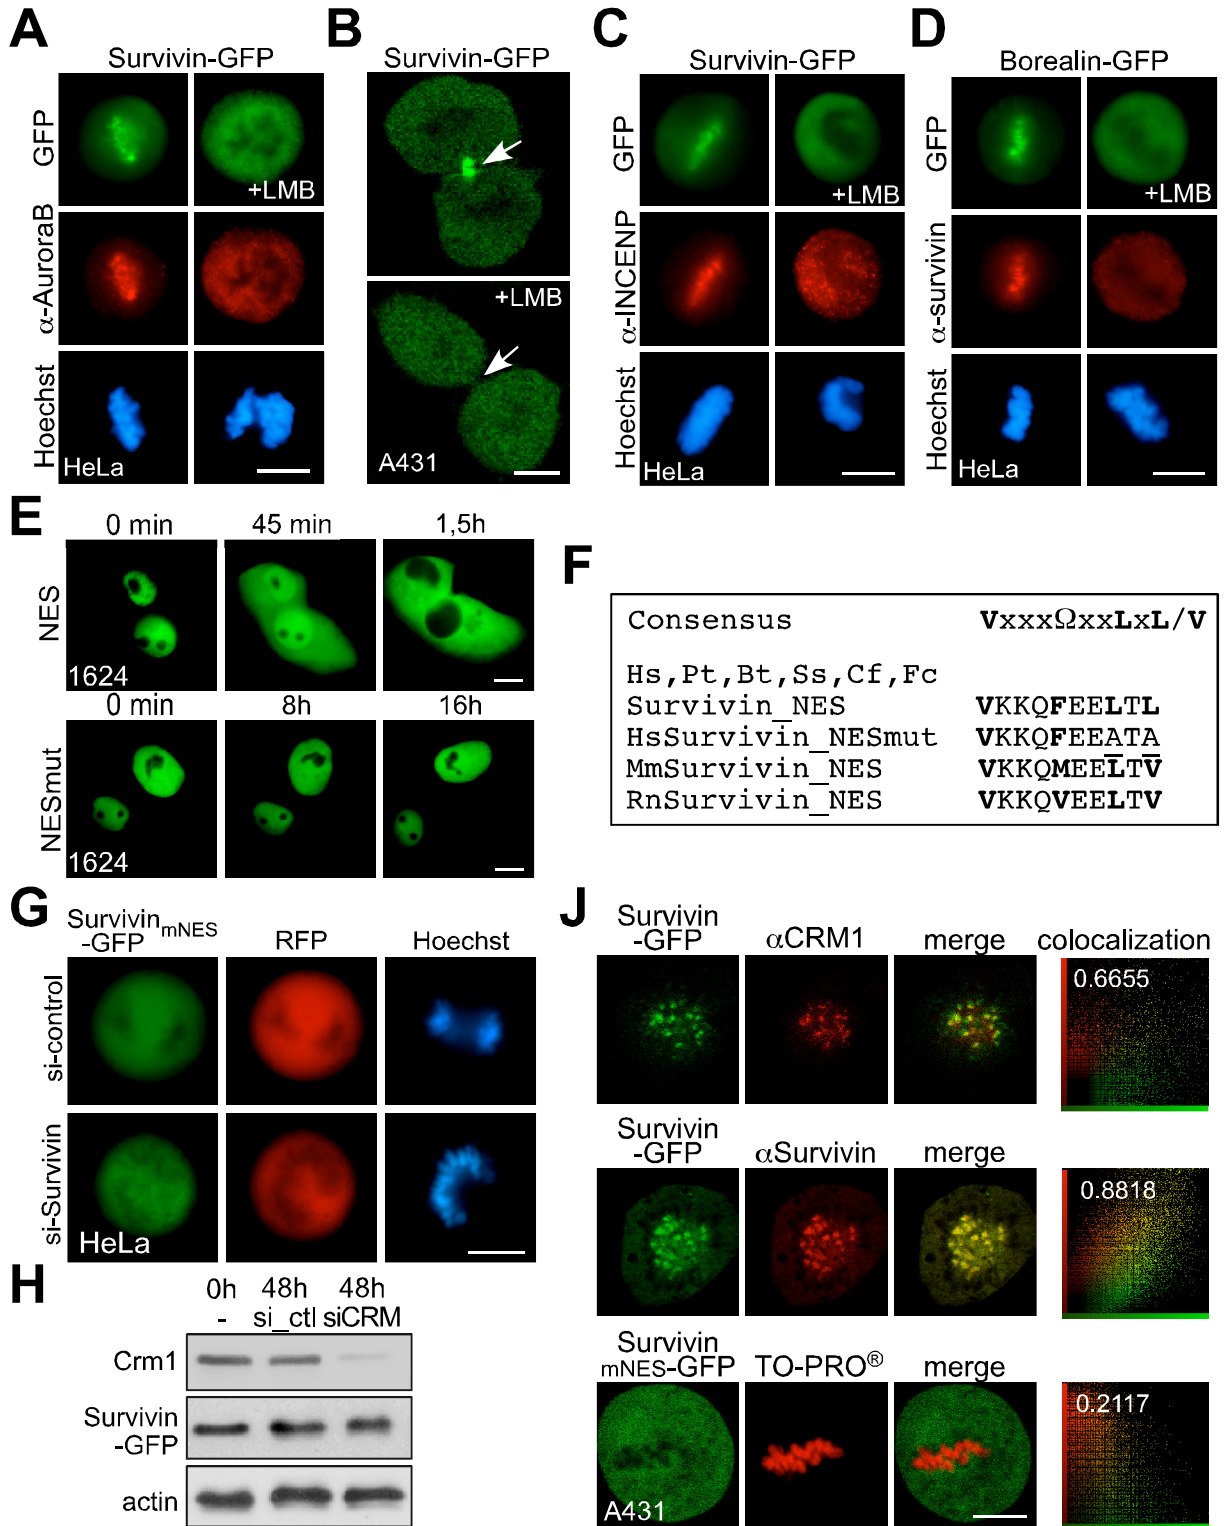

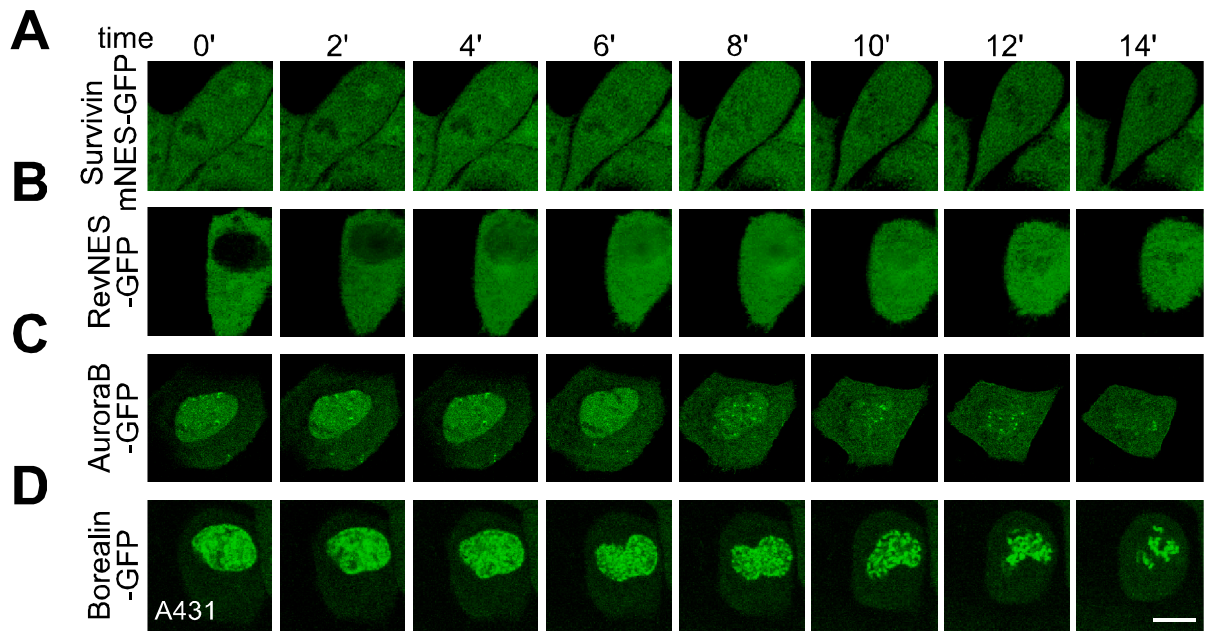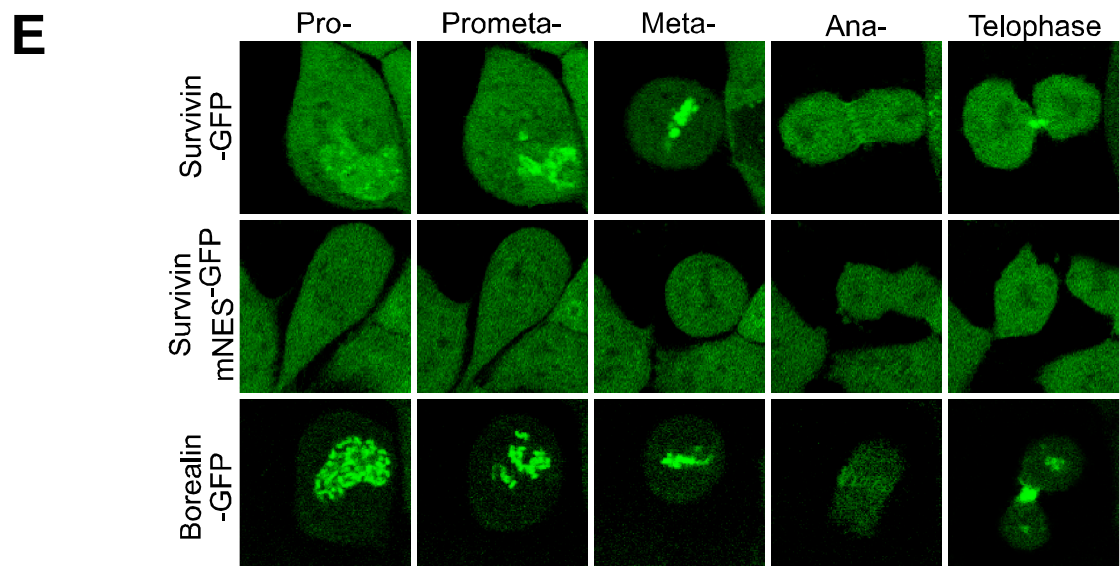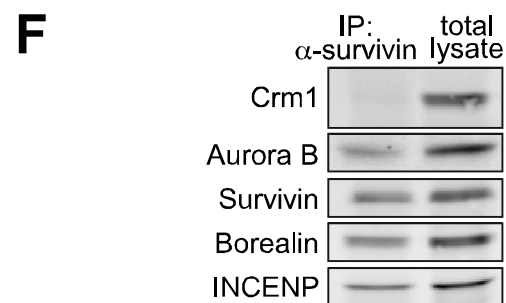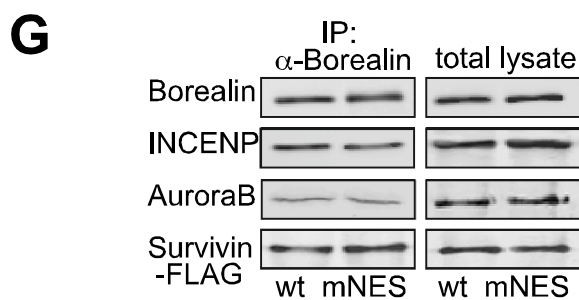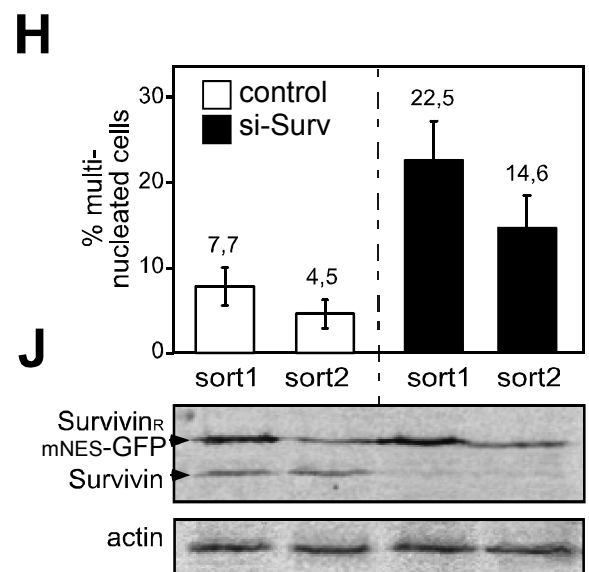

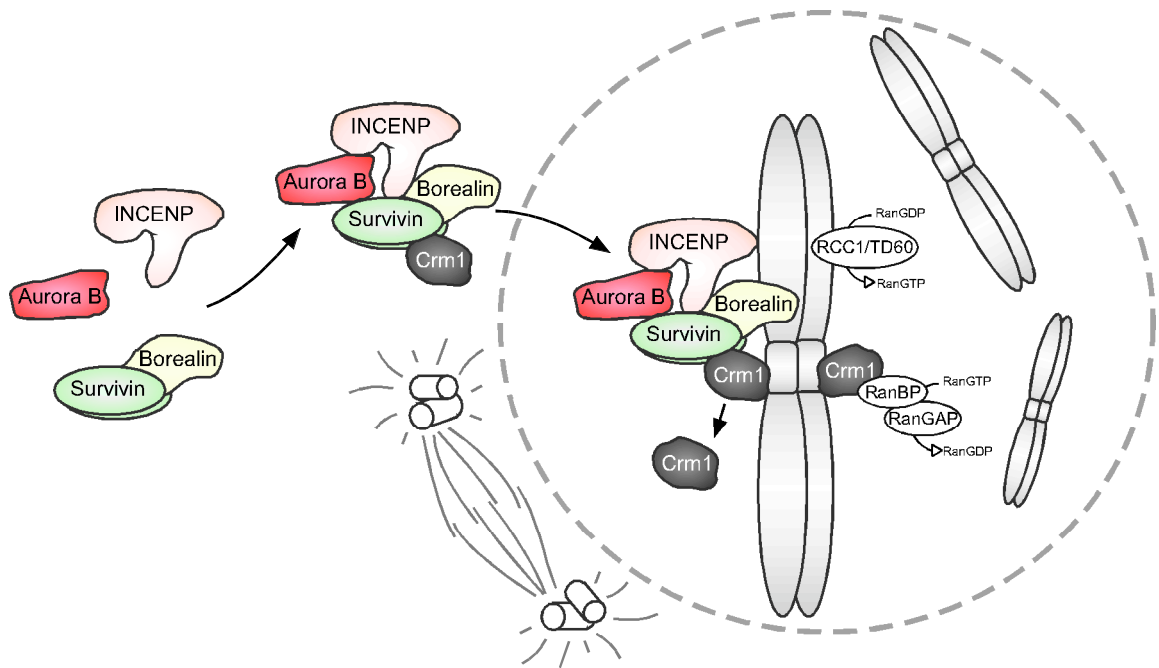

**SUPPLEMENTARY METHODS**

**Plasmids.** To generate NES-deficient Survivin, aa <sup>89</sup>VKKQFEELTL<sup>98</sup> were changed to <sup>89</sup>VKKQFEEATA<sup>98</sup> by mutagenesis as described (Knauer et al., 2005a). Likewise, pc3Survivin<sub>T<sup>97</sup>A</sub>-GFP and pc3Survivin<sub>T<sup>97</sup>D</sub>-GFP encode Survivin mutants in which the T<sup>97</sup> residue was changed to A or D by mutagenesis. Plasmids pc3Survivin<sub>R-WT</sub>-GFP and pc3Survivin<sub>R-mNES</sub>-GFP encode siRNA-resistant Survivin mutants, and were generated by introducing silent mutations at positions essential for siRNA-binding (nucleotides <sup>1229</sup>C→T and <sup>1236</sup>A→C). Plasmids are: pc3Survivin and pc3Survivin<sub>mNES</sub>, encoding WT and NES-deficient Survivin; pc3Survivin-GFP and pc3Survivin<sub>mNES</sub>-GFP, and pc3Survivin-FLAG and pc3Survivin<sub>mNES</sub>-FLAG encode WT and NES-deficient Survivin-FLAG or -GFP fusions. Bacterial expression plasmids are: pGEX-Survivin-GFP and pGEX-Survivin<sub>mNES</sub>-GFP, encoding WT and NES-deficient GST-Survivin-GFP fusions; pGEX-SurvivinNES-GFP and pGEX-SurvivinNESmut-GFP, encoding active and inactive GST-SurvivinNES-GFP fusions.

***In vitro* protein binding assay.** Coupled transcription/translation was performed using the TNT reticulocyte lysate system (Promega) supplemented with [<sup>35</sup>S] labelled methionine (Amersham Pharmacia Biotech) and the plasmids pc3Crm1-HA, pc3Survivin-GFP, pBSK\_hINCENP, pc3-Borealin, and pc3AuroraB-GFP as the templates.

Pull-down assays with the specific recombinant GST-GFP substrates bound to glutathione sepharose beads were carried according to (Knauer et al., 2005a). Briefly, 4 μg of the bound GST-GFP proteins were incubated with equal amounts of the transcription/translation mix. Following several washing steps, complexes were resolved by SDS-PAGE and visualized by fluorography. Crm1 pull-down assays were performed in the presence of 5 mM GTP-RanQ69L. GST-RanQ69L was purified in the presence of 0.1 mM GTP and stored in Ran-Buffer (50 mM HEPES, pH 7.6, 100 mM NaCl, 2 mM MgCl<sub>2</sub>, 0.5 mM EDTA, 1 mM DTT, 0.1 mM GTP) following proteolytic removal of GST to ensure GTP-loading.
